# Supplementary material
Source: MDPI journal article supplement (https://www.mdpi.com/2073-4441/9/4/259)

# Supplementary Materials: Characterizing Precipitation Variability and Trends in the World's Mediterranean-Climate Areas

Matthew J. Deitch, Michele J. Goodfellow and Shane T. Feirer

**Table S1.** Site name, code number, location, and period of record (between 1975 and 2015); average annual precipitation and CV, percentage of precipitation during the wet half of the year (fall-winter-spring: FWS) and CV, percentage of precipitation in summer and CV; and trends in annual precipitation, FWS precipitation, and summer precipitation, and associated variability (var'y) for sites in Australia. (ABoM indicates sites from Australian Bureau of Meteorology; GHCN indicates NOAA Global Historical Climatology Network)

| AUSTRALIA        | NOAA Site Number | LAT    | LONG   | Period of Record between 1975 and 2015 |       |       |       |       |       |       |       | Annual Precip |       | % In FWS |       | % In Summer |       | Annual, Trends |       | FWS Trends |       | Summer Trends |       |
|------------------|------------------|--------|--------|----------------------------------------|-------|-------|-------|-------|-------|-------|-------|---------------|-------|----------|-------|-------------|-------|----------------|-------|------------|-------|---------------|-------|
|                  |                  |        |        | 75-79                                  | 80-84 | 85-89 | 90-94 | 95-99 | 00-04 | 05-09 | 10-15 | Mean          | CV    | Mean     | CV    | Mean        | CV    | ppt            | var'y | ppt        | var'y | ppt           | var'y |
|                  |                  |        |        | ^ / v                                  | ^ / v | ^ / v | ^ / v | ^ / v | ^ / v | ^ / v | ^ / v | ^ / v         | ^ / v | ^ / v    | ^ / v | ^ / v       | ^ / v | ^ / v          | ^ / v | ^ / v      | ^ / v | ^ / v         | ^ / v |
| Kalbarri         | ABoM 8251        | -27.71 | 114.17 |                                        |       |       |       |       |       |       |       | 351.24        | 0.24  | 301.88   | 0.26  | 13.27       | 1.11  | v1             | 0     | 0          | 0     | 0             | 0     |
| Balline          | ABoM 8004        | -28.01 | 114.22 |                                        |       |       |       |       |       |       |       | 416.05        | 0.25  | 355.34   | 0.26  | 17.79       | 1.31  | v2             | 0     | v2         | ^2    | 0             | 0     |
| Lynton           | ABoM 8075        | -28.21 | 114.31 |                                        |       |       |       |       |       |       |       | 365.00        | 0.27  | 311.13   | 0.29  | 18.17       | 1.39  | v2             | 0     | v1         | 0     | 0             | 0     |
| Eurardy          | ABoM 8280        | -27.57 | 114.67 |                                        |       |       |       |       |       |       |       | 318.64        | 0.26  | 252.21   | 0.29  | 28.14       | 1.01  | v2             | 0     | 0          | 0     | 0             | 0     |
| Riverside        | ABoM 8113        | -27.83 | 114.74 |                                        |       |       |       |       |       |       |       | 298.41        | 0.30  | 233.14   | 0.29  | 31.65       | 1.19  | 0              | 0     | 0          | 0     | 0             | 0     |
| Oglive           | ABoM 8104        | -28.15 | 114.67 |                                        |       |       |       |       |       |       |       | 383.17        | 0.29  | 312.61   | 0.29  | 25.77       | 1.08  | 0              | 0     | 0          | 0     | ^2            | 0     |
| Mumby            | ABoM 8096        | -28.15 | 114.57 |                                        |       |       |       |       |       |       |       | 402.96        | 0.28  | 339.76   | 0.30  | 21.50       | 1.28  | 0              | 0     | 0          | ^2    | 0             | 0     |
| Binnu            | ABoM 8010        | -28.04 | 114.67 |                                        |       |       |       |       |       |       |       | 334.95        | 0.25  | 268.37   | 0.27  | 26.09       | 1.16  | 0              | 0     | 0          | 0     | 0             | 0     |
| Wandana          | ABoM 8294        | -28.21 | 115.28 |                                        |       |       |       |       |       |       |       | 317.21        | 0.34  | 227.01   | 0.36  | 45.99       | 1.05  | 0              | ^1    | v1         | 0     | 0             | 0     |
| Willigulli North | ABoM 8141        | -28.38 | 114.45 |                                        |       |       |       |       |       |       |       | 407.24        | 0.29  | 347.82   | 0.31  | 19.87       | 1.56  | 0              | 0     | v2         | 0     | 0             | 0     |
| Isseka           | ABoM 8065        | -28.43 | 114.65 |                                        |       |       |       |       |       |       |       | 440.85        | 0.26  | 373.12   | 0.28  | 23.89       | 1.16  | 0              | 0     | 0          | 0     | 0             | ^1    |
| Naraling         | ABoM 8274        | -28.42 | 114.82 |                                        |       |       |       |       |       |       |       | 369.11        | 0.24  | 300.54   | 0.27  | 26.28       | 1.32  | v1             | 0     | v2         | 0     | v2            | 0     |
| Yuna             | ABoM 8147        | -28.32 | 114.96 |                                        |       |       |       |       |       |       |       | 337.36        | 0.33  | 265.80   | 0.34  | 30.01       | 1.12  | v2             | 0     | 0          | 0     | 0             | 0     |
| Mataranka        | ABoM 8285        | -28.32 | 114.76 |                                        |       |       |       |       |       |       |       | 402.59        | 0.25  | 329.44   | 0.29  | 23.40       | 1.35  | v1             | 0     | v1         | 0     | 0             | 0     |
| Northhampton     | ABoM 8100        | -28.35 | 114.64 |                                        |       |       |       |       |       |       |       | 469.08        | 0.25  | 397.59   | 0.26  | 23.03       | 1.20  | 0              | 0     | 0          | 0     | 0             | 0     |
| Gleneva          | ABoM 8052        | -28.17 | 114.76 |                                        |       |       |       |       |       |       |       | 336.80        | 0.28  | 270.70   | 0.30  | 26.18       | 1.21  | 0              | ^1    | 0          | 0     | ^2            | 0     |
| Yellanup         | ABoM 9625        | -34.73 | 117.91 |                                        |       |       |       |       |       |       |       | 727.03        | 0.20  | 481.81   | 0.23  | 82.47       | 0.66  | 0              | ^1    | 0          | 0     | 0             | 0     |
| Woodburn         | ABoM 9621        | -34.70 | 117.96 |                                        |       |       |       |       |       |       |       | 716.62        | 0.16  | 470.15   | 0.16  | 86.39       | 0.54  | v2             | ^1    | v1         | 0     | 0             | 0     |
| Cape Leeuwin     | ABoM 9518        | -34.37 | 115.14 |                                        |       |       |       |       |       |       |       | 961.19        | 0.18  | 781.28   | 0.20  | 50.53       | 0.62  | v1             | ^1    | v1         | ^1    | v1            | ^2    |

[illegible]

[illegible]

[illegible]

|             |             |  |  |  |  |  |  |  |  |  |  |  |  |  |  |  |  |  |  |  |  |  |  |  |  |  |  |  |  |  |  |  |  |  |  |  |  |  |  |  |  |  |  |  |  |  |  |  |  |  |  |  |  |  |  |  |  |  |  |  |  |  |  |  |  |  |  |  |  |  |  |  |  |  |  |  |  |  |  |  |  |  |  |  |  |  |  |  |  |  |  |  |  |  |  |  |  |  |  |  |  |  |  |  |  |  |  |  |  |  |  |  |  |  |  |  |  |  |  |  |  |  |  |  |  |  |  |  |  |  |  |  |  |  |  |  |  |  |  |  |  |  |  |  |  |  |  |  |  |  |  |  |  |  |  |  |  |  |  |  |  |  |  |  |  |  |  |  |  |  |  |  |  |  |  |  |  |  |  |  |  |  |  |  |  |  |  |  |  |  |  |  |  |  |  |  |  |  |  |  |  |  |  |  |  |  |  |  |  |  |  |  |  |  |  |  |  |  |  |  |  |  |  |  |  |  |  |  |  |  |  |  |  |  |  |  |  |  |  |  |  |  |  |  |  |  |  |  |  |  |  |  |  |  |  |  |  |  |  |  |  |  |  |  |  |  |  |  |  |  |  |  |  |  |  |  |  |  |  |  |  |  |  |  |  |  |  |  |  |  |  |  |  |  |  |  |  |  |  |  |  |  |  |  |  |  |  |  |  |  |  |  |  |  |  |  |  |  |  |  |  |  |  |  |  |  |  |  |  |  |  |  |  |  |  |  |  |  |  |  |  |  |  |  |  |  |  |  |  |  |  |  |  |  |  |  |  |  |  |  |  |  |  |  |  |  |  |  |  |  |  |  |  |  |  |  |  |  |  |  |  |  |  |  |  |  |  |  |  |  |  |  |  |  |  |  |  |  |  |  |  |  |  |  |  |  |  |  |  |  |  |  |  |  |  |  |  |  |  |  |  |  |  |  |  |  |  |  |  |  |  |  |  |  |  |  |  |  |  |  |  |  |  |  |  |  |  |  |  |  |  |  |  |  |  |  |  |  |  |  |  |  |  |  |  |  |  |  |  |  |  |  |  |  |  |  |  |  |  |  |  |  |  |  |  |  |  |  |  |  |  |  |  |  |  |  |  |  |  |  |  |  |  |  |  |  |  |  |  |  |  |  |  |  |  |  |  |  |  |  |  |  |  |  |  |  |  |  |  |  |  |  |  |  |  |  |  |  |  |  |  |  |  |  |  |  |  |  |  |  |  |  |  |  |  |  |  |  |  |  |  |  |  |  |  |  |  |  |  |  |  |  |  |  |  |  |  |  |  |  |  |  |  |  |  |  |  |  |  |  |  |  |  |  |  |  |  |  |  |  |  |  |  |  |  |  |  |  |  |  |  |  |  |  |  |  |  |  |  |  |  |  |  |  |  |  |  |  |  |  |  |  |  |  |  |  |  |  |  |  |  |  |  |  |  |  |  |  |  |  |  |  |  |  |  |  |  |  |  |  |  |  |  |  |  |  |  |  |  |  |  |  |  |  |  |  |  |  |  |  |  |  |  |  |  |  |  |  |  |  |  |  |  |  |  |  |  |  |  |  |  |  |  |  |  |  |  |  |  |  |  |  |  |  |  |  |  |  |  |  |  |  |  |  |  |  |  |  |  |  |  |  |  |  |  |  |  |  |  |  |  |  |  |  |  |  |  |  |  |  |  |  |  |  |  |  |  |  |  |  |  |  |  |  |  |  |  |  |  |  |  |  |  |  |  |  |  |  |  |  |  |  |  |  |  |  |  |  |  |  |  |  |  |  |  |  |  |  |  |  |  |  |  |  |  |  |  |  |  |  |  |  |  |  |  |  |  |  |  |  |  |  |  |  |  |  |  |  |  |  |  |  |  |  |  |  |  |  |  |  |  |  |  |  |  |  |  |  |  |  |  |  |  |  |  |  |  |  |  |  |  |  |  |  |  |  |  |  |  |  |  |  |  |  |  |  |  |  |  |  |  |  |  |  |  |  |  |  |  |  |  |  |  |  |  |  |  |  |  |  |  |  |  |  |  |  |  |  |  |  |  |  |  |  |  |  |  |  |  |  |  |  |  |  |  |  |  |  |  |  |  |  |  |  |  |  |  |  |  |  |  |  |  |  |  |  |  |  |  |  |  |  |  |  |  |  |  |  |  |  |  |  |  |  |  |  |  |  |  |  |  |  |  |  |  |  |  |  |  |  |  |  |  |  |  |  |  |  |  |  |  |  |  |  |  |  |  |  |  |  |  |  |  |  |  |  |  |  |  |  |  |  |  |  |  |  |  |  |  |  |  |  |  |  |  |  |  |  |  |  |  |  |  |  |  |  |  |  |  |  |  |  |  |  |  |  |  |  |  |  |  |  |  |  |  |  |  |  |  |  |  |  |  |  |  |  |  |  |  |  |  |  |  |  |  |  |  |  |  |  |  |  |  |  |  |  |  |  |  |  |  |  |  |  |  |  |  |  |  |  |  |  |  |  |  |  |  |  |  |  |  |  |  |  |  |  |  |  |  |  |  |  |  |  |  |  |  |  |  |  |  |  |  |  |  |  |  |  |  |  |  |  |  |  |  |  |  |  |  |  |  |  |  |  |  |  |  |  |  |  |  |  |  |  |  |  |  |  |  |  |  |  |  |  |  |  |  |  |  |  |  |  |  |  |  |  |  |  |  |  |  |  |  |  |  |  |  |  |  |  |  |  |  |  |  |  |  |  |  |  |  |  |  |  |  |  |  |  |  |  |  |  |  |  |  |  |  |  |  |  |  |  |  |  |  |  |  |  |  |  |  |  |  |  |  |  |  |  |  |  |  |  |  |  |  |  |  |  |  |  |  |  |  |  |  |  |  |  |  |  |  |  |  |  |  |  |  |  |  |  |  |  |  |  |  |  |  |  |  |  |  |  |  |  |  |  |  |  |  |  |  |  |  |  |  |  |  |  |  |  |  |  |  |  |  |  |  |  |  |  |  |  |  |  |  |  |  |  |  |  |  |  |  |  |  |  |  |  |  |  |  |  |  |  |  |  |  |  |  |  |  |  |  |  |  |  |  |  |  |  |  |  |  |  |  |  |  |  |  |  |  |  |  |  |  |  |  |  |  |  |  |  |  |  |  |  |  |  |  |  |    |
|-------------|-------------|--|--|--|--|--|--|--|--|--|--|--|--|--|--|--|--|--|--|--|--|--|--|--|--|--|--|--|--|--|--|--|--|--|--|--|--|--|--|--|--|--|--|--|--|--|--|--|--|--|--|--|--|--|--|--|--|--|--|--|--|--|--|--|--|--|--|--|--|--|--|--|--|--|--|--|--|--|--|--|--|--|--|--|--|--|--|--|--|--|--|--|--|--|--|--|--|--|--|--|--|--|--|--|--|--|--|--|--|--|--|--|--|--|--|--|--|--|--|--|--|--|--|--|--|--|--|--|--|--|--|--|--|--|--|--|--|--|--|--|--|--|--|--|--|--|--|--|--|--|--|--|--|--|--|--|--|--|--|--|--|--|--|--|--|--|--|--|--|--|--|--|--|--|--|--|--|--|--|--|--|--|--|--|--|--|--|--|--|--|--|--|--|--|--|--|--|--|--|--|--|--|--|--|--|--|--|--|--|--|--|--|--|--|--|--|--|--|--|--|--|--|--|--|--|--|--|--|--|--|--|--|--|--|--|--|--|--|--|--|--|--|--|--|--|--|--|--|--|--|--|--|--|--|--|--|--|--|--|--|--|--|--|--|--|--|--|--|--|--|--|--|--|--|--|--|--|--|--|--|--|--|--|--|--|--|--|--|--|--|--|--|--|--|--|--|--|--|--|--|--|--|--|--|--|--|--|--|--|--|--|--|--|--|--|--|--|--|--|--|--|--|--|--|--|--|--|--|--|--|--|--|--|--|--|--|--|--|--|--|--|--|--|--|--|--|--|--|--|--|--|--|--|--|--|--|--|--|--|--|--|--|--|--|--|--|--|--|--|--|--|--|--|--|--|--|--|--|--|--|--|--|--|--|--|--|--|--|--|--|--|--|--|--|--|--|--|--|--|--|--|--|--|--|--|--|--|--|--|--|--|--|--|--|--|--|--|--|--|--|--|--|--|--|--|--|--|--|--|--|--|--|--|--|--|--|--|--|--|--|--|--|--|--|--|--|--|--|--|--|--|--|--|--|--|--|--|--|--|--|--|--|--|--|--|--|--|--|--|--|--|--|--|--|--|--|--|--|--|--|--|--|--|--|--|--|--|--|--|--|--|--|--|--|--|--|--|--|--|--|--|--|--|--|--|--|--|--|--|--|--|--|--|--|--|--|--|--|--|--|--|--|--|--|--|--|--|--|--|--|--|--|--|--|--|--|--|--|--|--|--|--|--|--|--|--|--|--|--|--|--|--|--|--|--|--|--|--|--|--|--|--|--|--|--|--|--|--|--|--|--|--|--|--|--|--|--|--|--|--|--|--|--|--|--|--|--|--|--|--|--|--|--|--|--|--|--|--|--|--|--|--|--|--|--|--|--|--|--|--|--|--|--|--|--|--|--|--|--|--|--|--|--|--|--|--|--|--|--|--|--|--|--|--|--|--|--|--|--|--|--|--|--|--|--|--|--|--|--|--|--|--|--|--|--|--|--|--|--|--|--|--|--|--|--|--|--|--|--|--|--|--|--|--|--|--|--|--|--|--|--|--|--|--|--|--|--|--|--|--|--|--|--|--|--|--|--|--|--|--|--|--|--|--|--|--|--|--|--|--|--|--|--|--|--|--|--|--|--|--|--|--|--|--|--|--|--|--|--|--|--|--|--|--|--|--|--|--|--|--|--|--|--|--|--|--|--|--|--|--|--|--|--|--|--|--|--|--|--|--|--|--|--|--|--|--|--|--|--|--|--|--|--|--|--|--|--|--|--|--|--|--|--|--|--|--|--|--|--|--|--|--|--|--|--|--|--|--|--|--|--|--|--|--|--|--|--|--|--|--|--|--|--|--|--|--|--|--|--|--|--|--|--|--|--|--|--|--|--|--|--|--|--|--|--|--|--|--|--|--|--|--|--|--|--|--|--|--|--|--|--|--|--|--|--|--|--|--|--|--|--|--|--|--|--|--|--|--|--|--|--|--|--|--|--|--|--|--|--|--|--|--|--|--|--|--|--|--|--|--|--|--|--|--|--|--|--|--|--|--|--|--|--|--|--|--|--|--|--|--|--|--|--|--|--|--|--|--|--|--|--|--|--|--|--|--|--|--|--|--|--|--|--|--|--|--|--|--|--|--|--|--|--|--|--|--|--|--|--|--|--|--|--|--|--|--|--|--|--|--|--|--|--|--|--|--|--|--|--|--|--|--|--|--|--|--|--|--|--|--|--|--|--|--|--|--|--|--|--|--|--|--|--|--|--|--|--|--|--|--|--|--|--|--|--|--|--|--|--|--|--|--|--|--|--|--|--|--|--|--|--|--|--|--|--|--|--|--|--|--|--|--|--|--|--|--|--|--|--|--|--|--|--|--|--|--|--|--|--|--|--|--|--|--|--|--|--|--|--|--|--|--|--|--|--|--|--|--|--|--|--|--|--|--|--|--|--|--|--|--|--|--|--|--|--|--|--|--|--|--|--|--|--|--|--|--|--|--|--|--|--|--|--|--|--|--|--|--|--|--|--|--|--|--|--|--|--|--|--|--|--|--|--|--|--|--|--|--|--|--|--|--|--|--|--|--|--|--|--|--|--|--|--|--|--|--|--|--|--|--|--|--|--|--|--|--|--|--|--|--|--|--|--|--|--|--|--|--|--|--|--|--|--|--|--|--|--|--|--|--|--|--|--|--|--|--|--|--|--|--|--|--|--|--|--|--|--|--|--|--|--|--|--|--|--|--|--|--|--|--|--|--|--|--|--|--|--|--|--|--|--|--|--|--|--|--|--|--|--|--|--|--|--|--|--|--|--|--|--|--|--|--|--|--|--|--|--|--|--|--|--|--|--|--|--|--|--|--|--|--|--|--|--|--|--|--|--|--|--|--|--|--|--|--|--|--|--|--|--|--|--|--|--|--|--|--|--|--|--|--|--|--|--|--|--|--|--|--|--|--|--|--|--|--|--|--|--|--|--|--|--|--|--|--|--|--|--|--|--|--|--|--|--|--|--|--|--|--|--|--|--|--|--|--|--|--|--|--|--|--|--|--|--|--|--|--|--|--|--|--|--|--|--|--|--|--|--|--|--|--|--|--|--|--|--|--|--|--|--|--|--|--|--|--|--|--|--|--|--|--|--|--|--|--|--|--|--|--|--|--|----|
| AVENUE ROAD | ASN00091161 |  |  |  |  |  |  |  |  |  |  |  |  |  |  |  |  |  |  |  |  |  |  |  |  |  |  |  |  |  |  |  |  |  |  |  |  |  |  |  |  |  |  |  |  |  |  |  |  |  |  |  |  |  |  |  |  |  |  |  |  |  |  |  |  |  |  |  |  |  |  |  |  |  |  |  |  |  |  |  |  |  |  |  |  |  |  |  |  |  |  |  |  |  |  |  |  |  |  |  |  |  |  |  |  |  |  |  |  |  |  |  |  |  |  |  |  |  |  |  |  |  |  |  |  |  |  |  |  |  |  |  |  |  |  |  |  |  |  |  |  |  |  |  |  |  |  |  |  |  |  |  |  |  |  |  |  |  |  |  |  |  |  |  |  |  |  |  |  |  |  |  |  |  |  |  |  |  |  |  |  |  |  |  |  |  |  |  |  |  |  |  |  |  |  |  |  |  |  |  |  |  |  |  |  |  |  |  |  |  |  |  |  |  |  |  |  |  |  |  |  |  |  |  |  |  |  |  |  |  |  |  |  |  |  |  |  |  |  |  |  |  |  |  |  |  |  |  |  |  |  |  |  |  |  |  |  |  |  |  |  |  |  |  |  |  |  |  |  |  |  |  |  |  |  |  |  |  |  |  |  |  |  |  |  |  |  |  |  |  |  |  |  |  |  |  |  |  |  |  |  |  |  |  |  |  |  |  |  |  |  |  |  |  |  |  |  |  |  |  |  |  |  |  |  |  |  |  |  |  |  |  |  |  |  |  |  |  |  |  |  |  |  |  |  |  |  |  |  |  |  |  |  |  |  |  |  |  |  |  |  |  |  |  |  |  |  |  |  |  |  |  |  |  |  |  |  |  |  |  |  |  |  |  |  |  |  |  |  |  |  |  |  |  |  |  |  |  |  |  |  |  |  |  |  |  |  |  |  |  |  |  |  |  |  |  |  |  |  |  |  |  |  |  |  |  |  |  |  |  |  |  |  |  |  |  |  |  |  |  |  |  |  |  |  |  |  |  |  |  |  |  |  |  |  |  |  |  |  |  |  |  |  |  |  |  |  |  |  |  |  |  |  |  |  |  |  |  |  |  |  |  |  |  |  |  |  |  |  |  |  |  |  |  |  |  |  |  |  |  |  |  |  |  |  |  |  |  |  |  |  |  |  |  |  |  |  |  |  |  |  |  |  |  |  |  |  |  |  |  |  |  |  |  |  |  |  |  |  |  |  |  |  |  |  |  |  |  |  |  |  |  |  |  |  |  |  |  |  |  |  |  |  |  |  |  |  |  |  |  |  |  |  |  |  |  |  |  |  |  |  |  |  |  |  |  |  |  |  |  |  |  |  |  |  |  |  |  |  |  |  |  |  |  |  |  |  |  |  |  |  |  |  |  |  |  |  |  |  |  |  |  |  |  |  |  |  |  |  |  |  |  |  |  |  |  |  |  |  |  |  |  |  |  |  |  |  |  |  |  |  |  |  |  |  |  |  |  |  |  |  |  |  |  |  |  |  |  |  |  |  |  |  |  |  |  |  |  |  |  |  |  |  |  |  |  |  |  |  |  |  |  |  |  |  |  |  |  |  |  |  |  |  |  |  |  |  |  |  |  |  |  |  |  |  |  |  |  |  |  |  |  |  |  |  |  |  |  |  |  |  |  |  |  |  |  |  |  |  |  |  |  |  |  |  |  |  |  |  |  |  |  |  |  |  |  |  |  |  |  |  |  |  |  |  |  |  |  |  |  |  |  |  |  |  |  |  |  |  |  |  |  |  |  |  |  |  |  |  |  |  |  |  |  |  |  |  |  |  |  |  |  |  |  |  |  |  |  |  |  |  |  |  |  |  |  |  |  |  |  |  |  |  |  |  |  |  |  |  |  |  |  |  |  |  |  |  |  |  |  |  |  |  |  |  |  |  |  |  |  |  |  |  |  |  |  |  |  |  |  |  |  |  |  |  |  |  |  |  |  |  |  |  |  |  |  |  |  |  |  |  |  |  |  |  |  |  |  |  |  |  |  |  |  |  |  |  |  |  |  |  |  |  |  |  |  |  |  |  |  |  |  |  |  |  |  |  |  |  |  |  |  |  |  |  |  |  |  |  |  |  |  |  |  |  |  |  |  |  |  |  |  |  |  |  |  |  |  |  |  |  |  |  |  |  |  |  |  |  |  |  |  |  |  |  |  |  |  |  |  |  |  |  |  |  |  |  |  |  |  |  |  |  |  |  |  |  |  |  |  |  |  |  |  |  |  |  |  |  |  |  |  |  |  |  |  |  |  |  |  |  |  |  |  |  |  |  |  |  |  |  |  |  |  |  |  |  |  |  |  |  |  |  |  |  |  |  |  |  |  |  |  |  |  |  |  |  |  |  |  |  |  |  |  |  |  |  |  |  |  |  |  |  |  |  |  |  |  |  |  |  |  |  |  |  |  |  |  |  |  |  |  |  |  |  |  |  |  |  |  |  |  |  |  |  |  |  |  |  |  |  |  |  |  |  |  |  |  |  |  |  |  |  |  |  |  |  |  |  |  |  |  |  |  |  |  |  |  |  |  |  |  |  |  |  |  |  |  |  |  |  |  |  |  |  |  |  |  |  |  |  |  |  |  |  |  |  |  |  |  |  |  |  |  |  |  |  |  |  |  |  |  |  |  |  |  |  |  |  |  |  |  |  |  |  |  |  |  |  |  |  |  |  |  |  |  |  |  |  |  |  |  |  |  |  |  |  |  |  |  |  |  |  |  |  |  |  |  |  |  |  |  |  |  |  |  |  |  |  |  |  |  |  |  |  |  |  |  |  |  |  |  |  |  |  |  |  |  |  |  |  |  |  |  |  |  |  |  |  |  |  |  |  |  |  |  |  |  |  |  |  |  |  |  |  |  |  |  |  |  |  |  |  |  |  |  |  |  |  |  |  |  |  |  |  |  |  |  |  |  |  |  |  |  |  |  |  |  |  |  |  |  |  |  |  |  |  |  |  |  |  |  |  |  |  |  |  |  |  |  |  |  |  |  |  |  |  |  |  |  |  |  |  |  |  |  |  |  |  |  |  |  |  |  |  |  |  |  |  |  |  |  |  |  |  |  |  |  |  |  |  |  |  |  |  |  |  |  |  |  |  |  |  |  |  |  |  |  |  |  | </ |
|-------------|-------------|--|--|--|--|--|--|--|--|--|--|--|--|--|--|--|--|--|--|--|--|--|--|--|--|--|--|--|--|--|--|--|--|--|--|--|--|--|--|--|--|--|--|--|--|--|--|--|--|--|--|--|--|--|--|--|--|--|--|--|--|--|--|--|--|--|--|--|--|--|--|--|--|--|--|--|--|--|--|--|--|--|--|--|--|--|--|--|--|--|--|--|--|--|--|--|--|--|--|--|--|--|--|--|--|--|--|--|--|--|--|--|--|--|--|--|--|--|--|--|--|--|--|--|--|--|--|--|--|--|--|--|--|--|--|--|--|--|--|--|--|--|--|--|--|--|--|--|--|--|--|--|--|--|--|--|--|--|--|--|--|--|--|--|--|--|--|--|--|--|--|--|--|--|--|--|--|--|--|--|--|--|--|--|--|--|--|--|--|--|--|--|--|--|--|--|--|--|--|--|--|--|--|--|--|--|--|--|--|--|--|--|--|--|--|--|--|--|--|--|--|--|--|--|--|--|--|--|--|--|--|--|--|--|--|--|--|--|--|--|--|--|--|--|--|--|--|--|--|--|--|--|--|--|--|--|--|--|--|--|--|--|--|--|--|--|--|--|--|--|--|--|--|--|--|--|--|--|--|--|--|--|--|--|--|--|--|--|--|--|--|--|--|--|--|--|--|--|--|--|--|--|--|--|--|--|--|--|--|--|--|--|--|--|--|--|--|--|--|--|--|--|--|--|--|--|--|--|--|--|--|--|--|--|--|--|--|--|--|--|--|--|--|--|--|--|--|--|--|--|--|--|--|--|--|--|--|--|--|--|--|--|--|--|--|--|--|--|--|--|--|--|--|--|--|--|--|--|--|--|--|--|--|--|--|--|--|--|--|--|--|--|--|--|--|--|--|--|--|--|--|--|--|--|--|--|--|--|--|--|--|--|--|--|--|--|--|--|--|--|--|--|--|--|--|--|--|--|--|--|--|--|--|--|--|--|--|--|--|--|--|--|--|--|--|--|--|--|--|--|--|--|--|--|--|--|--|--|--|--|--|--|--|--|--|--|--|--|--|--|--|--|--|--|--|--|--|--|--|--|--|--|--|--|--|--|--|--|--|--|--|--|--|--|--|--|--|--|--|--|--|--|--|--|--|--|--|--|--|--|--|--|--|--|--|--|--|--|--|--|--|--|--|--|--|--|--|--|--|--|--|--|--|--|--|--|--|--|--|--|--|--|--|--|--|--|--|--|--|--|--|--|--|--|--|--|--|--|--|--|--|--|--|--|--|--|--|--|--|--|--|--|--|--|--|--|--|--|--|--|--|--|--|--|--|--|--|--|--|--|--|--|--|--|--|--|--|--|--|--|--|--|--|--|--|--|--|--|--|--|--|--|--|--|--|--|--|--|--|--|--|--|--|--|--|--|--|--|--|--|--|--|--|--|--|--|--|--|--|--|--|--|--|--|--|--|--|--|--|--|--|--|--|--|--|--|--|--|--|--|--|--|--|--|--|--|--|--|--|--|--|--|--|--|--|--|--|--|--|--|--|--|--|--|--|--|--|--|--|--|--|--|--|--|--|--|--|--|--|--|--|--|--|--|--|--|--|--|--|--|--|--|--|--|--|--|--|--|--|--|--|--|--|--|--|--|--|--|--|--|--|--|--|--|--|--|--|--|--|--|--|--|--|--|--|--|--|--|--|--|--|--|--|--|--|--|--|--|--|--|--|--|--|--|--|--|--|--|--|--|--|--|--|--|--|--|--|--|--|--|--|--|--|--|--|--|--|--|--|--|--|--|--|--|--|--|--|--|--|--|--|--|--|--|--|--|--|--|--|--|--|--|--|--|--|--|--|--|--|--|--|--|--|--|--|--|--|--|--|--|--|--|--|--|--|--|--|--|--|--|--|--|--|--|--|--|--|--|--|--|--|--|--|--|--|--|--|--|--|--|--|--|--|--|--|--|--|--|--|--|--|--|--|--|--|--|--|--|--|--|--|--|--|--|--|--|--|--|--|--|--|--|--|--|--|--|--|--|--|--|--|--|--|--|--|--|--|--|--|--|--|--|--|--|--|--|--|--|--|--|--|--|--|--|--|--|--|--|--|--|--|--|--|--|--|--|--|--|--|--|--|--|--|--|--|--|--|--|--|--|--|--|--|--|--|--|--|--|--|--|--|--|--|--|--|--|--|--|--|--|--|--|--|--|--|--|--|--|--|--|--|--|--|--|--|--|--|--|--|--|--|--|--|--|--|--|--|--|--|--|--|--|--|--|--|--|--|--|--|--|--|--|--|--|--|--|--|--|--|--|--|--|--|--|--|--|--|--|--|--|--|--|--|--|--|--|--|--|--|--|--|--|--|--|--|--|--|--|--|--|--|--|--|--|--|--|--|--|--|--|--|--|--|--|--|--|--|--|--|--|--|--|--|--|--|--|--|--|--|--|--|--|--|--|--|--|--|--|--|--|--|--|--|--|--|--|--|--|--|--|--|--|--|--|--|--|--|--|--|--|--|--|--|--|--|--|--|--|--|--|--|--|--|--|--|--|--|--|--|--|--|--|--|--|--|--|--|--|--|--|--|--|--|--|--|--|--|--|--|--|--|--|--|--|--|--|--|--|--|--|--|--|--|--|--|--|--|--|--|--|--|--|--|--|--|--|--|--|--|--|--|--|--|--|--|--|--|--|--|--|--|--|--|--|--|--|--|--|--|--|--|--|--|--|--|--|--|--|--|--|--|--|--|--|--|--|--|--|--|--|--|--|--|--|--|--|--|--|--|--|--|--|--|--|--|--|--|--|--|--|--|--|--|--|--|--|--|--|--|--|--|--|--|--|--|--|--|--|--|--|--|--|--|--|--|--|--|--|--|--|--|--|--|--|--|--|--|--|--|--|--|--|--|--|--|--|--|--|--|--|--|--|--|--|--|--|--|--|--|--|--|--|--|--|--|--|--|--|--|--|--|--|--|--|--|--|--|--|--|--|--|--|--|--|--|--|--|--|--|--|--|--|--|--|--|--|--|--|--|--|--|--|--|--|--|--|--|--|--|--|--|--|--|--|--|--|--|--|--|--|--|--|--|--|--|--|--|--|--|--|--|--|--|--|--|--|--|--|--|--|--|--|--|--|--|--|--|--|--|--|----|

**Table S2.** Site name, code number, location, and period of record (between 1975 and 2015); average annual precipitation and CV, percentage of precipitation during the wet half of the year (fall-winter-spring: FWS) and CV, percentage of precipitation in summer and CV; and trends in annual precipitation, FWS precipitation, and summer precipitation, and associated variability (var'y) for sites in the Mediterranean region. (Data from NOAA Climate Data Online, except last site, from GHCN)

| Mediterranean Region |                  |       |        | Period of Record between 1975 and 2015 |       |       |       |       |       |       |       | Annual Precip |     | % In FWS |     | % In Summer |     | Annual, Trends |       | FWS Trends |       | Summer Trends |       |
|----------------------|------------------|-------|--------|----------------------------------------|-------|-------|-------|-------|-------|-------|-------|---------------|-----|----------|-----|-------------|-----|----------------|-------|------------|-------|---------------|-------|
|                      | NOAA Site Number | LAT   | LONG   | 75–79                                  | 80–84 | 85–89 | 90–94 | 95–99 | 00–04 | 05–09 | 10–15 | Mean          | CV  | Mean     | CV  | Mean        | CV  | ppt            | var'y | ppt        | var'y | ppt           | var'y |
|                      |                  |       |        |                                        |       |       |       |       |       |       |       |               |     |          |     |             |     | ^ / v          | ^ / v | ^ / v      | ^ / v | ^ / v         | ^ / v |
| CARTHAGE             | 607150           | 36.85 | 10.227 |                                        |       |       |       |       |       |       |       | 466           | 0.3 | 321      | 0.3 | 25.1        | 1   | 0              | 0     | 0          | 0     | 0             | 0     |
| TABARKA 7 NOVEMBRE   | 607100           | 36.98 | 8.877  |                                        |       |       |       |       |       |       |       | 832           | 0.4 | 631      | 0.4 | 26.2        | 1.1 | ^1             | 0     | ^1         | v2    | 0             | 0     |
| ANNABA               | 603600           | 36.82 | 7.809  |                                        |       |       |       |       |       |       |       | 633           | 0.3 | 463      | 0.3 | 20          | 0.9 | 0              | 0     | 0          | 0     | 0             | 0     |
| SKIKDA               | 603550           | 36.93 | 6.95   |                                        |       |       |       |       |       |       |       | 640           | 0.3 | 487      | 0.4 | 20.4        | 0.7 | 0              | ^2    | v1         | 0     | 0             | 0     |
| MOHAMED BOUDIAF INTL | 604190           | 36.28 | 6.62   |                                        |       |       |       |       |       |       |       | 482           | 0.3 | 335      | 0.4 | 32          | 0.7 | 0              | 0     | 0          | 0     | 0             | 0     |
| IJEL                 | 603510           | 36.8  | 5.874  |                                        |       |       |       |       |       |       |       | 891           | 0.3 | 674      | 0.3 | 24.1        | 0.8 | ^1             | 0     | ^1         | 0     | 0             | 0     |
| SETIF AIN ARNAT      | 604450           | 36.18 | 5.324  |                                        |       |       |       |       |       |       |       | 400           | 0.3 | 239      | 0.4 | 53.8        | 0.8 | 0              | 0     | ^1         | 0     | 0             | 0     |
| HOUARI BOUMEDIEN E   | 603900           | 36.69 | 3.215  |                                        |       |       |       |       |       |       |       | 578           | 0.3 | 437      | 0.3 | 19.9        | 1   | 0              | 0     | ^2         | v1    | 0             | v1    |
| MILIANA              | 604300           | 36.3  | 2.233  |                                        |       |       |       |       |       |       |       | 645           | 0.4 | 509      | 0.4 | 19.6        | 1   | ^1             | 0     | ^1         | 0     | 0             | 0     |
| BOU CHEKIF           | 605110           | 35.34 | 1.463  |                                        |       |       |       |       |       |       |       | 343           | 0.4 | 228      | 0.5 | 23.6        | 0.7 | ^1             | 0     | ^1         | 0     | 0             | 0     |
| ANGADS               | 601150           | 34.79 | -1.924 |                                        |       |       |       |       |       |       |       | 279           | 0.3 | 185      | 0.4 | 23.7        | 1.6 | 0              | 0     | 0          | v2    | 0             | v1    |
| CHERIF EL IDRISSI    | 601070           | 35.18 | -3.84  |                                        |       |       |       |       |       |       |       | 301           | 0.4 | 211      | 0.5 | 17.3        | 1.8 | 0              | 0     | 0          | v2    | 0             | 0     |
| IBN BATOUTA          | 601010           | 35.73 | -5.917 |                                        |       |       |       |       |       |       |       | 647           | 0.4 | 485      | 0.5 | 9.83        | 1.4 | 0              | 0     | 0          | v1    | 0             | v1    |
| SANIAT RMEL          | 603180           | 35.59 | -5.32  |                                        |       |       |       |       |       |       |       | 643           | 0.4 | 489      | 0.5 | 8.45        | 1.3 | 0              | 0     | 0          | 0     | 0             | 0     |
| BASSATINE            | 601500           | 33.88 | -5.515 |                                        |       |       |       |       |       |       |       | 466           | 0.4 | 341      | 0.4 | 16.5        | 1.5 | 0              | 0     | 0          | 0     | 0             | 0     |
| SAISS                | 601410           | 33.93 | -4.978 |                                        |       |       |       |       |       |       |       | 455           | 0.4 | 322      | 0.4 | 24.6        | 1.4 | ^1             | 0     | ^1         | 0     | 0             | ^1    |
| SALE                 | 601350           | 34.05 | -6.752 |                                        |       |       |       |       |       |       |       | 505           | 0.4 | 396      | 0.5 | 7           | 1.4 | 0              | 0     | 0          | 0     | 0             | v2    |
| ANFA                 | 601550           | 33.56 | -7.66  |                                        |       |       |       |       |       |       |       | 377           | 0.5 | 312      | 0.5 | 12.5        | 2   | 0              | ^1    | 0          | ^1    | 0             | 0     |

[illegible]

|                   |        |       |        |  |  |  |  |  |  |  |  |  |  |  |  |  |  |      |     |      |     |      |     |    |    |    |  |    |    |    |    |
|-------------------|--------|-------|--------|--|--|--|--|--|--|--|--|--|--|--|--|--|--|------|-----|------|-----|------|-----|----|----|----|--|----|----|----|----|
| CUATRO VIENTOS    | 82230  | 40.37 | -3.785 |  |  |  |  |  |  |  |  |  |  |  |  |  |  | 397  | 0.3 | 245  | 0.4 | 27.3 | 0.7 | 0  | v1 | 0  |  | v1 | 0  |    | 0  |
| BARAJAS           | 82210  | 40.49 | -3.567 |  |  |  |  |  |  |  |  |  |  |  |  |  |  | 400  | 0.3 | 222  | 0.4 | 52.9 | 1   | v2 | 0  | 0  |  | 0  | ^1 |    | v2 |
| SALAMANCA         | 82020  | 40.95 | -5.502 |  |  |  |  |  |  |  |  |  |  |  |  |  |  | 370  | 0.2 | 198  | 0.3 | 55.4 | 0.9 | ^1 | 0  | 0  |  | 0  |    | v1 | 0  |
| VALLADOLID        | 81400  | 41.71 | -4.852 |  |  |  |  |  |  |  |  |  |  |  |  |  |  | 396  | 0.3 | 225  | 0.5 | 57.3 | 0.7 | 0  | 0  | 0  |  | 0  | 0  | 0  | 0  |
| VALLADOLID        | 81410  | 41.63 | -4.75  |  |  |  |  |  |  |  |  |  |  |  |  |  |  | 432  | 0.3 | 252  | 0.4 | 54.6 | 0.6 | 0  | 0  | 0  |  | 0  |    | v1 | 0  |
| BURGOS            | 80750  | 42.36 | -3.621 |  |  |  |  |  |  |  |  |  |  |  |  |  |  | 525  | 0.2 | 303  | 0.3 | 74.1 | 0.6 | 0  | 0  | ^1 |  | 0  | 0  |    | v1 |
| LEON              | 80550  | 42.59 | -5.656 |  |  |  |  |  |  |  |  |  |  |  |  |  |  | 506  | 0.3 | 283  | 0.4 | 66.8 | 0.6 | v1 | 0  | 0  |  | 0  |    | v1 | v1 |
| VIGO              | 80450  | 42.23 | -8.627 |  |  |  |  |  |  |  |  |  |  |  |  |  |  | 1752 | 0.3 | 1172 | 0.4 | 145  | 0.6 | v2 | 0  | v2 |  | 0  | 0  |    | v2 |
| SANTIAGO          | 80420  | 42.9  | -8.415 |  |  |  |  |  |  |  |  |  |  |  |  |  |  | 1634 | 0.3 | 1073 | 0.4 | 154  | 0.5 | 0  | 0  | 0  |  | 0  | 0  | 0  | v2 |
| LA CORUNA         | 80010  | 43.37 | -8.417 |  |  |  |  |  |  |  |  |  |  |  |  |  |  | 1006 | 0.2 | 636  | 0.3 | 115  | 0.6 | 0  | v2 | ^2 |  | 0  | 0  | 0  | 0  |
| OVIEDO            | 80150  | 43.35 | -5.867 |  |  |  |  |  |  |  |  |  |  |  |  |  |  | 972  | 0.2 | 568  | 0.3 | 160  | 0.5 | 0  | 0  | ^2 |  | 0  | 0  | 0  | 0  |
| MENORCA           | 83140  | 39.86 | 4.219  |  |  |  |  |  |  |  |  |  |  |  |  |  |  | 556  | 0.2 | 341  | 0.3 | 38.5 | 1   | 0  | 0  | ^2 |  | 0  |    | v2 | 0  |
| PALMA DE MALLORCA | 83060  | 39.55 | 2.733  |  |  |  |  |  |  |  |  |  |  |  |  |  |  | 424  | 0.3 | 233  | 0.3 | 36.6 | 0.9 | 0  | 0  | 0  |  | v1 | v2 |    | 0  |
| NIMES/COUR BESSAC | 76450  | 43.87 | 4.4    |  |  |  |  |  |  |  |  |  |  |  |  |  |  | 685  | 0.2 | 350  | 0.4 | 103  | 0.6 | 0  | 0  | 0  |  | 0  | 0  | 0  | ^2 |
| CARITAT           | 75790  | 44.14 | 4.867  |  |  |  |  |  |  |  |  |  |  |  |  |  |  | 645  | 0.3 | 300  | 0.4 | 107  | 0.8 | 0  | 0  | 0  |  | 0  | 0  | 0  | 0  |
| PROVENCE          | 76500  | 43.44 | 5.214  |  |  |  |  |  |  |  |  |  |  |  |  |  |  | 522  | 0.3 | 275  | 0.4 | 70.4 | 0.9 | v2 | 0  | 0  |  | 0  | 0  | 0  | 0  |
| CAP CEPET         | 76610  | 43.08 | 5.933  |  |  |  |  |  |  |  |  |  |  |  |  |  |  | 570  | 0.4 | 346  | 0.5 | 38.6 | 0.9 | 0  | 0  | 0  |  | 0  | 0  | 0  | 0  |
| LE PALLYVESTRE    | 76670  | 43.1  | 6.146  |  |  |  |  |  |  |  |  |  |  |  |  |  |  | 644  | 0.3 | 391  | 0.4 | 57.8 | 0.9 | 0  | v2 | 0  |  | 0  | 0  | 0  | 0  |
| LE CANNET         | 76750  | 43.39 | 6.387  |  |  |  |  |  |  |  |  |  |  |  |  |  |  | 669  | 0.4 | 363  | 0.6 | 80.7 | 0.9 | 0  | ^1 | ^1 |  | ^2 |    | 0  | 0  |
| COTE D AZUR       | 76900  | 43.66 | 7.216  |  |  |  |  |  |  |  |  |  |  |  |  |  |  | 757  | 0.3 | 459  | 0.4 | 67.7 | 0.8 | 0  | 0  | 0  |  | ^1 |    | 0  | 0  |
| CAP CORSE         | 77850  | 43    | 9.367  |  |  |  |  |  |  |  |  |  |  |  |  |  |  | 515  | 0.3 | 304  | 0.4 | 45.4 | 0.8 | 0  | 0  | 0  |  | 0  | 0  | 0  | v2 |
| PORETTA           | 77900  | 42.55 | 9.484  |  |  |  |  |  |  |  |  |  |  |  |  |  |  | 774  | 0.3 | 456  | 0.3 | 78.1 | 0.8 | v1 | ^2 | v1 |  | 0  |    | v1 | 0  |
| SAINT CATHERINE   | 77540  | 42.53 | 8.793  |  |  |  |  |  |  |  |  |  |  |  |  |  |  | 585  | 0.3 | 361  | 0.4 | 66.7 | 0.9 | 0  | 0  | ^2 |  | 0  |    | v2 | 0  |
| SOLENZARA         | 77650  | 41.92 | 9.406  |  |  |  |  |  |  |  |  |  |  |  |  |  |  | 632  | 0.3 | 388  | 0.4 | 47.3 | 0.6 | ^1 | 0  | ^1 |  | 0  | 0  | 0  | 0  |
| CAMPO DELL ORO    | 77610  | 41.92 | 8.803  |  |  |  |  |  |  |  |  |  |  |  |  |  |  | 667  | 0.3 | 406  | 0.3 | 56.1 | 1   | 0  | 0  | 0  |  | ^1 |    | 0  | 0  |
| CAP PERTUSATO     | 77700  | 41.37 | 9.167  |  |  |  |  |  |  |  |  |  |  |  |  |  |  | 581  | 0.3 | 351  | 0.4 | 44.5 | 1.5 | 0  | 0  | ^2 |  | 0  | 0  | 0  | 0  |
| CAPE MELE         | 161530 | 43.95 | 8.167  |  |  |  |  |  |  |  |  |  |  |  |  |  |  | 661  | 0.3 | 386  | 0.4 | 63   | 0.8 | 0  | 0  | 0  |  | ^1 | v2 |    | v1 |

|                             |        |       |        |  |  |  |  |  |  |  |  |  |  |  |  |  |  |  |  |      |     |      |     |      |     |    |    |    |    |    |    |
|-----------------------------|--------|-------|--------|--|--|--|--|--|--|--|--|--|--|--|--|--|--|--|--|------|-----|------|-----|------|-----|----|----|----|----|----|----|
| GENOVA<br>SESTRI            | 161200 | 44.41 | 8.842  |  |  |  |  |  |  |  |  |  |  |  |  |  |  |  |  | 957  | 0.3 | 511  | 0.5 | 136  | 0.8 | v1 | ^1 | 0  | ^1 | v1 | 0  |
| PIACENZA                    | 160840 | 44.91 | 9.723  |  |  |  |  |  |  |  |  |  |  |  |  |  |  |  |  | 1193 | 0.8 | 648  | 0.9 | 194  | 0.7 | 0  | 0  | 0  | 0  | v1 | ^1 |
| CISA PASS                   | 161240 | 44.43 | 9.933  |  |  |  |  |  |  |  |  |  |  |  |  |  |  |  |  | 1171 | 0.7 | 721  | 0.9 | 143  | 0.8 | v1 | ^1 | v1 | ^2 | v1 | ^1 |
| FIRENZE                     | 161700 | 43.81 | 11.205 |  |  |  |  |  |  |  |  |  |  |  |  |  |  |  |  | 860  | 0.2 | 479  | 0.3 | 132  | 0.5 | v1 | 0  | 0  | 0  | v1 | 0  |
| PISA                        | 161580 | 43.68 | 10.393 |  |  |  |  |  |  |  |  |  |  |  |  |  |  |  |  | 925  | 0.3 | 492  | 0.4 | 145  | 0.7 | v2 | 0  | 0  | 0  | v1 | 0  |
| FRONTONE                    | 161790 | 43.52 | 12.733 |  |  |  |  |  |  |  |  |  |  |  |  |  |  |  |  | 1006 | 0.3 | 535  | 0.3 | 197  | 0.6 | v2 | v2 | 0  | 0  | v1 | v1 |
| PERUGIA                     | 161810 | 43.1  | 12.513 |  |  |  |  |  |  |  |  |  |  |  |  |  |  |  |  | 787  | 0.2 | 377  | 0.3 | 155  | 0.5 | 0  | 0  | 0  | 0  | 0  | 0  |
| TERMINILLO<br>MOUNTAIN      | 162190 | 42.47 | 12.983 |  |  |  |  |  |  |  |  |  |  |  |  |  |  |  |  | 2653 | 1   | 2175 | 1.1 | 163  | 0.9 | ^1 | v1 | ^1 | v1 | v1 | 0  |
| PESCARA                     | 162300 | 42.43 | 14.181 |  |  |  |  |  |  |  |  |  |  |  |  |  |  |  |  | 702  | 0.3 | 381  | 0.4 | 139  | 0.6 | 0  | ^1 | 0  | ^1 | v1 | 0  |
| CAMPOBASS<br>O              | 162520 | 41.57 | 14.65  |  |  |  |  |  |  |  |  |  |  |  |  |  |  |  |  | 654  | 0.4 | 399  | 0.6 | 102  | 0.5 | ^1 | ^2 | ^1 | 0  | ^2 | 0  |
| PONZA<br>ISLAND             | 162800 | 40.92 | 12.95  |  |  |  |  |  |  |  |  |  |  |  |  |  |  |  |  | 646  | 0.3 | 404  | 0.4 | 44.3 | 0.9 | 0  | 0  | 0  | 0  | v1 | 0  |
| AMENDOLA                    | 162610 | 41.54 | 15.718 |  |  |  |  |  |  |  |  |  |  |  |  |  |  |  |  | 499  | 0.3 | 269  | 0.4 | 102  | 0.9 | ^1 | 0  | 0  | 0  | v1 | 0  |
| MARINA DI<br>GINOSA         | 163250 | 40.43 | 16.883 |  |  |  |  |  |  |  |  |  |  |  |  |  |  |  |  | 470  | 0.4 | 290  | 0.5 | 49.2 | 0.8 | 0  | ^2 | 0  | 0  | 0  | v1 |
| NAPOLI/CAP<br>ODICHINO      | 162890 | 40.85 | 14.3   |  |  |  |  |  |  |  |  |  |  |  |  |  |  |  |  | 1036 | 0.3 | 628  | 0.4 | 100  | 0.8 | v1 | 0  | 0  | 0  | 0  | 0  |
| BARI                        | 162700 | 41.13 | 16.767 |  |  |  |  |  |  |  |  |  |  |  |  |  |  |  |  | 519  | 0.3 | 300  | 0.4 | 66.1 | 0.7 | v1 | ^1 | v2 | 0  | v1 | ^2 |
| CASALE                      | 163200 | 40.66 | 17.947 |  |  |  |  |  |  |  |  |  |  |  |  |  |  |  |  | 683  | 0.4 | 440  | 0.5 | 58.9 | 1   | v2 | 0  | 0  | 0  | v2 | ^2 |
| SANTA<br>MARIA DI<br>LEUC   | 163600 | 39.82 | 18.35  |  |  |  |  |  |  |  |  |  |  |  |  |  |  |  |  | 525  | 0.3 | 360  | 0.5 | 29.1 | 0.9 | ^2 | 0  | 0  | 0  | 0  | 0  |
| CAPE<br>PALINURO            | 163100 | 40.02 | 15.283 |  |  |  |  |  |  |  |  |  |  |  |  |  |  |  |  | 694  | 0.2 | 459  | 0.3 | 55.8 | 0.8 | v2 | 0  | 0  | 0  | 0  | 0  |
| CROTONE                     | 163500 | 39    | 17.08  |  |  |  |  |  |  |  |  |  |  |  |  |  |  |  |  | 742  | 0.3 | 510  | 0.4 | 54.8 | 1.2 | ^2 | ^1 | 0  | ^1 | 0  | 0  |
| LAMEZIA<br>TERME            | 163620 | 38.91 | 16.242 |  |  |  |  |  |  |  |  |  |  |  |  |  |  |  |  | 811  | 0.4 | 553  | 0.5 | 73.3 | 1.1 | 0  | 0  | 0  | ^2 | 0  | 0  |
| MESSINA                     | 164200 | 38.2  | 15.55  |  |  |  |  |  |  |  |  |  |  |  |  |  |  |  |  | 889  | 0.2 | 592  | 0.3 | 72.6 | 0.8 | ^1 | 0  | 0  | 0  | 0  | 0  |
| USTICA<br>ISLAND            | 164000 | 38.7  | 13.183 |  |  |  |  |  |  |  |  |  |  |  |  |  |  |  |  | 526  | 0.3 | 333  | 0.4 | 40.8 | 1.4 | 0  | 0  | 0  | ^2 | 0  | 0  |
| CATANIA<br>FONTANARO<br>SSA | 164600 | 37.47 | 15.066 |  |  |  |  |  |  |  |  |  |  |  |  |  |  |  |  | 625  | 0.5 | 410  | 0.5 | 60.3 | 1.9 | v1 | 0  | 0  | 0  | 0  | v1 |
| COZZO                       | 164800 | 36.68 | 15.133 |  |  |  |  |  |  |  |  |  |  |  |  |  |  |  |  | 565  | 0.4 | 383  | 0.5 | 18.7 | 1.8 | 0  | 0  | 0  | 0  | 0  | 0  |

[illegible]

[illegible]

|             |                       |       |        |  |  |  |  |  |  |  |  |  |  |  |  |  |  |     |      |     |      |      |      |   |   |   |   |   |   |
|-------------|-----------------------|-------|--------|--|--|--|--|--|--|--|--|--|--|--|--|--|--|-----|------|-----|------|------|------|---|---|---|---|---|---|
| BEN GURION  | 401800                | 32.01 | 34.887 |  |  |  |  |  |  |  |  |  |  |  |  |  |  | 427 | 0.44 | 401 | 0.45 | 0.47 | 2.79 | 0 | 0 | 0 | 0 | 0 | 0 |
| BABULSAR    | 407360                | 36.72 | 52.65  |  |  |  |  |  |  |  |  |  |  |  |  |  |  | 784 | 0.34 | 460 | 0.35 | 101  | 0.87 | 0 | 0 | 0 | 0 | 0 | 0 |
| KAMISHLI SY | GHCND:<br>SY000040001 | 37.05 | 41.22  |  |  |  |  |  |  |  |  |  |  |  |  |  |  | 422 | 0.32 | 365 | 0.30 | 2.97 | 1.45 | 0 | 0 | 0 | 0 | 0 | 0 |

**Table S3.** Site name, code number, location, and period of record (between 1975 and 2015); average annual precipitation and CV, percentage of precipitation during the wet half of the year (fall-winter-spring: FWS) and CV, percentage of precipitation in summer and CV; and trends in annual precipitation, FWS precipitation, and summer precipitation, and associated variability (var'y) for sites in North America. (Data from NOAA Climate Data Online, unless indicated as GHCN)

| North America                |                  |       |         | Period of Record between 1975 and 2015 |       |       |       |       |       |       |       | Annual Precip |      | % In FWS |      | % In Summer |      | Annual, Trends |                | FWS Trends   |                | Summer Trends |                |
|------------------------------|------------------|-------|---------|----------------------------------------|-------|-------|-------|-------|-------|-------|-------|---------------|------|----------|------|-------------|------|----------------|----------------|--------------|----------------|---------------|----------------|
|                              | NOAA Site Number | LAT   | LONG    | 75–79                                  | 80–84 | 85–89 | 90–94 | 95–99 | 00–04 | 05–09 | 10–15 | Mean          | CV   | Mean     | CV   | Mean        | CV   | ppt<br>^ / v   | var'y<br>^ / v | ppt<br>^ / v | var'y<br>^ / v | ppt<br>^ / v  | var'y<br>^ / v |
| LONG BEACH / DAUGHERTY FIELD | 722970           | 33.81 | -118.15 |                                        |       |       |       |       |       |       |       | 289.18        | 0.59 | 259.56   | 0.61 | 4.80        | 1.60 | 0              | v1             | 0            | 0              | 0             | 0              |
| LOS ANGELES INTERNATIONL     | 722950           | 33.94 | -118.39 |                                        |       |       |       |       |       |       |       | 347.48        | 0.58 | 313.55   | 0.56 | 4.12        | 1.66 | v1             | v1             | v1           | 0              | 0             | 0              |
| POINT MUGU                   | 723910           | 34.12 | -119.12 |                                        |       |       |       |       |       |       |       | 475.17        | 0.53 | 325.07   | 0.54 | 59.54       | 0.98 | v1             | v1             | v1           | ^2             | v1            | 0              |
| SANTA BARBARA MUNICIPAL      | 723925           | 34.43 | -119.84 |                                        |       |       |       |       |       |       |       | 397.61        | 0.52 | 349.94   | 0.57 | 8.36        | 1.67 | v1             | v1             | v1           | 0              | 0             | 0              |
| SANTA MARIA PUB/CAPT G A HAN | 723940           | 34.90 | -120.45 |                                        |       |       |       |       |       |       |       | 353.55        | 0.54 | 312.52   | 0.50 | 5.27        | 1.76 | v2             | ^1             | v2           | 0              | 0             | 0              |
| PASO ROBLES MUNICIPAL        | 723965           | 35.67 | -120.63 |                                        |       |       |       |       |       |       |       | 318.24        | 0.54 | 287.62   | 0.55 | 2.79        | 1.84 | v1             | v2             | v1           | 0              | v1            | v1             |
| CASTLE                       | 724810           | 37.38 | -120.57 |                                        |       |       |       |       |       |       |       | 313.18        | 0.34 | 277.04   | 0.39 | 4.81        | 1.30 | v2             | v1             | 0            | 0              | v2            | 0              |
| STOCKTON METROPOLITAN        | 724920           | 37.89 | -121.23 |                                        |       |       |       |       |       |       |       | 289.69        | 0.43 | 252.91   | 0.45 | 4.60        | 1.35 | 0              | ^2             | ^2           | v1             | 0             | 0              |
| SAN FRANCISCO INTERNATIONAL  | 724940           | 37.62 | -122.37 |                                        |       |       |       |       |       |       |       | 510.18        | 0.32 | 470.33   | 0.34 | 5.20        | 1.70 | v2             | ^2             | v1           | 0              | 0             | 0              |
| FAIRFIELD/ TRAVIS AF         | 745160           | 38.27 | -121.95 |                                        |       |       |       |       |       |       |       | 553.40        | 0.42 | 499.97   | 0.43 | 6.66        | 1.38 | 0              | 0              | 0            | 0              | ^1            | 0              |
| SACRAMENTO EXECUTIVE AIRPORT | 724830           | 38.51 | -121.50 |                                        |       |       |       |       |       |       |       | 462.53        | 0.38 | 405.43   | 0.38 | 14.18       | 1.53 | 0              | 0              | 0            | v1             | v2            | 0              |

|                           |        |       |         |  |  |  |  |  |  |  |  |  |  |  |  |  |         |      |         |      |        |      |    |   |    |    |    |    |
|---------------------------|--------|-------|---------|--|--|--|--|--|--|--|--|--|--|--|--|--|---------|------|---------|------|--------|------|----|---|----|----|----|----|
| MATHER FIELD              | 724835 | 38.57 | -121.30 |  |  |  |  |  |  |  |  |  |  |  |  |  | 514.65  | 0.40 | 452.74  | 0.44 | 10.74  | 1.19 | 0  | 0 | 0  | 0  | v2 | v2 |
| MC CLELLAN AFLD           | 724836 | 38.67 | -121.40 |  |  |  |  |  |  |  |  |  |  |  |  |  | 605.99  | 0.40 | 532.28  | 0.42 | 11.14  | 1.12 | 0  | 0 | 0  | 0  | 0  | ^2 |
| BEALE AFB                 | 724837 | 39.13 | -121.43 |  |  |  |  |  |  |  |  |  |  |  |  |  | 537.81  | 0.37 | 467.85  | 0.38 | 9.50   | 1.15 | 0  | 0 | 0  | 0  | 0  | 0  |
| BLUE CANYON - NYACK ARPT  | 725845 | 39.28 | -120.71 |  |  |  |  |  |  |  |  |  |  |  |  |  | 1466.88 | 0.37 | 1219.98 | 0.42 | 35.20  | 1.03 | 0  | 0 | 0  | v1 | 0  | 0  |
| RED BLUFF MUNICIPAL       | 725910 | 40.15 | -122.25 |  |  |  |  |  |  |  |  |  |  |  |  |  | 548.63  | 0.32 | 466.34  | 0.32 | 15.88  | 0.89 | 0  | 0 | 0  | 0  | 0  | 0  |
| REDDING MUNICIPAL         | 725920 | 40.52 | -122.30 |  |  |  |  |  |  |  |  |  |  |  |  |  | 867.35  | 0.31 | 726.68  | 0.33 | 27.83  | 0.86 | v1 | 0 | v1 | 0  | 0  | 0  |
| JACK MC NAMARA FLD        | 725946 | 41.77 | -124.23 |  |  |  |  |  |  |  |  |  |  |  |  |  | 1180.39 | 0.30 | 949.30  | 0.35 | 48.88  | 0.69 | 0  | 0 | 0  | 0  | 0  | ^1 |
| GRATON                    | 0      | 38.44 | -122.87 |  |  |  |  |  |  |  |  |  |  |  |  |  | 1045.38 | 0.34 | 935.46  | 0.36 | 10.38  | 1.43 | 0  | 0 | 0  | 0  | 0  | 0  |
| HEALDSBURG                | 0      | 38.63 | -122.87 |  |  |  |  |  |  |  |  |  |  |  |  |  | 1080.22 | 0.37 | 975.95  | 0.40 | 8.91   | 1.37 | 0  | 0 | 0  | 0  | 0  | 0  |
| ROGUE VALLEY INTL-MEDFORD | 725970 | 42.38 | -122.87 |  |  |  |  |  |  |  |  |  |  |  |  |  | 489.22  | 0.27 | 359.89  | 0.34 | 41.01  | 0.77 | 0  | 0 | 0  | v1 | 0  | v2 |
| SEXTON SUMMIT             | 725975 | 42.60 | -123.36 |  |  |  |  |  |  |  |  |  |  |  |  |  | 986.15  | 0.32 | 789.48  | 0.41 | 41.17  | 0.72 | ^1 | 0 | ^2 | 0  | 0  | 0  |
| NORTH BEND MUNI           | 726917 | 43.42 | -124.23 |  |  |  |  |  |  |  |  |  |  |  |  |  | 1399.00 | 0.26 | 1076.21 | 0.31 | 81.11  | 0.76 | 0  | 0 | 0  | 0  | v2 | ^1 |
| MAHLON SWEET FIELD        | 726930 | 44.13 | -123.22 |  |  |  |  |  |  |  |  |  |  |  |  |  | 1155.03 | 0.28 | 904.48  | 0.32 | 68.87  | 0.59 | v1 | 0 | v1 | 0  | v1 | 0  |
| MCNARY FIELD              | 726940 | 44.91 | -123.00 |  |  |  |  |  |  |  |  |  |  |  |  |  | 978.80  | 0.23 | 755.33  | 0.28 | 62.94  | 0.50 | 0  | 0 | 0  | ^2 | v1 | 0  |
| PORTLAND INTERNATIONAL    | 726980 | 45.60 | -122.61 |  |  |  |  |  |  |  |  |  |  |  |  |  | 935.84  | 0.20 | 671.27  | 0.25 | 80.38  | 0.45 | 0  | 0 | 0  | 0  | v1 | 0  |
| EASTERN OR REGIONAL       | 726880 | 45.70 | -118.86 |  |  |  |  |  |  |  |  |  |  |  |  |  | 332.87  | 0.21 | 211.42  | 0.27 | 45.93  | 0.57 | v1 | 0 | v1 | v2 | v2 | v1 |
| ASTORIA REGIONAL          | 727910 | 46.16 | -123.88 |  |  |  |  |  |  |  |  |  |  |  |  |  | 1822.74 | 0.18 | 1370.51 | 0.21 | 117.83 | 0.46 | 0  | 0 | 0  | 0  | v2 | 0  |
| WALLA WALLA REGIONAL ARPT | 727846 | 46.10 | -118.29 |  |  |  |  |  |  |  |  |  |  |  |  |  | 501.29  | 0.23 | 311.55  | 0.25 | 77.33  | 0.70 | 0  | 0 | v2 | 0  | 0  | ^1 |
| OLYMPIA AIRPORT           | 727920 | 46.97 | -122.90 |  |  |  |  |  |  |  |  |  |  |  |  |  | 1205.08 | 0.19 | 905.05  | 0.24 | 83.97  | 0.42 | 0  | 0 | 0  | 0  | v1 | 0  |

|                                                                    |                           |       |         |  |  |  |  |  |  |  |  |  |  |  |  |  |  |         |      |         |      |        |      |    |    |   |    |    |    |   |
|--------------------------------------------------------------------|---------------------------|-------|---------|--|--|--|--|--|--|--|--|--|--|--|--|--|--|---------|------|---------|------|--------|------|----|----|---|----|----|----|---|
| BOWERMAN<br>AIRPORT                                                | 727923                    | 46.97 | -123.93 |  |  |  |  |  |  |  |  |  |  |  |  |  |  | 1545.93 | 0.26 | 1147.42 | 0.28 | 100.64 | 0.48 | ^1 | 0  |   | ^1 | v2 | v2 | 0 |
| FORT<br>LEWIS/GRAY AAF                                             | 742070                    | 47.13 | -122.60 |  |  |  |  |  |  |  |  |  |  |  |  |  |  | 1046.11 | 0.18 | 764.89  | 0.24 | 95.72  | 0.39 | 0  | 0  | 0 | 0  | 0  | 0  | 0 |
| QUILLAYUTE<br>AIRPORT                                              | 727970                    | 47.94 | -124.56 |  |  |  |  |  |  |  |  |  |  |  |  |  |  | 2516.89 | 0.18 | 1810.52 | 0.21 | 203.02 | 0.50 | 0  | 0  | 0 | 0  | 0  | v2 | 0 |
| SEATTLE-TACOMA<br>INTERNATIONAL                                    | 727930                    | 47.44 | -122.31 |  |  |  |  |  |  |  |  |  |  |  |  |  |  | 969.77  | 0.19 | 693.27  | 0.24 | 83.98  | 0.40 | 0  | 0  |   | ^2 | 0  | 0  | 0 |
| KETCHIKAN<br>INTL AIRPORT                                          | 703950                    | 55.36 | -131.71 |  |  |  |  |  |  |  |  |  |  |  |  |  |  | 3387.91 | 0.31 | 1847.62 | 0.35 | 552.43 | 0.43 | 0  | 0  |   | ^1 | 0  | ^1 | 0 |
| PRINCE RUPERT                                                      | 718980                    | 54.28 | -130.45 |  |  |  |  |  |  |  |  |  |  |  |  |  |  | 2431.57 | 0.22 | 1358.69 | 0.25 | 344.75 | 0.39 | 0  | 0  | 0 |    | ^1 | 0  | 0 |
| SANDSPIT                                                           | 711010                    | 53.25 | -131.81 |  |  |  |  |  |  |  |  |  |  |  |  |  |  | 1250.85 | 0.24 | 801.76  | 0.25 | 146.59 | 0.44 | v1 | 0  |   | v1 | 0  | v1 | 0 |
| PORT HARDY                                                         | 711090                    | 50.68 | -127.37 |  |  |  |  |  |  |  |  |  |  |  |  |  |  | 1901.41 | 0.13 | 1253.45 | 0.18 | 200.64 | 0.32 | 0  | 0  | 0 | 0  | 0  | 0  | 0 |
| COMOX                                                              | 718930                    | 49.71 | -124.89 |  |  |  |  |  |  |  |  |  |  |  |  |  |  | 1090.23 | 0.29 | 781.77  | 0.32 | 106.97 | 0.79 | 0  | 0  | 0 | 0  | 0  | 0  | 0 |
| PORT ALBERNI<br>(AUT) BC                                           | 714750                    | 49.32 | -124.92 |  |  |  |  |  |  |  |  |  |  |  |  |  |  | 1617.80 | 0.30 | 1234.43 | 0.35 | 93.07  | 0.49 | ^1 | 0  | 0 | 0  | 0  | 0  | 0 |
| ABBOTSFORD                                                         | 711080                    | 49.03 | -122.36 |  |  |  |  |  |  |  |  |  |  |  |  |  |  | 1572.87 | 0.19 | 1064.51 | 0.21 | 173.54 | 0.35 | 0  | 0  | 0 | 0  | 0  | 0  | 0 |
| ANGWIN PAC<br>UNION COL CA                                         | GHCND:<br>USC<br>00040212 | 38.58 | -122.43 |  |  |  |  |  |  |  |  |  |  |  |  |  |  | 998.97  | 0.37 | 895.18  | 0.39 | 11.33  | 1.35 | 0  | 0  | 0 |    | v1 | 0  | 0 |
| BIG SUR STATION<br>CA US                                           | GHCND:<br>USC<br>00040790 | 36.25 | -121.78 |  |  |  |  |  |  |  |  |  |  |  |  |  |  | 1026.34 | 0.38 | 938.25  | 0.40 | 8.78   | 2.04 | 0  | 0  | 0 |    | v2 | v1 | 0 |
| CHICO<br>UNIVERSITY<br>FARM CA US                                  | GHCND:<br>USC<br>00041715 | 39.72 | -121.83 |  |  |  |  |  |  |  |  |  |  |  |  |  |  | 590.32  | 0.37 | 505.42  | 0.39 | 14.27  | 1.07 | 0  | v1 |   | ^2 | 0  | 0  | 0 |
| EUREKA<br>WEATHER<br>FORECAST<br>OFFICE<br>WOODLEY<br>ISLAND CA US | GHCND:<br>USW<br>00024213 | 40.80 | -124.17 |  |  |  |  |  |  |  |  |  |  |  |  |  |  | 993.87  | 0.24 | 835.32  | 0.28 | 27.59  | 0.86 | 0  | v2 | 0 | 0  | 0  | 0  | 0 |
| FAIRFIELD CA                                                       | GHCND:<br>USC<br>00042934 | 38.25 | -122.05 |  |  |  |  |  |  |  |  |  |  |  |  |  |  | 563.08  | 0.38 | 507.77  | 0.40 | 5.66   | 1.65 | 0  | v2 | 0 |    | v1 | 0  | 0 |

|                              |                           |       |         |  |  |  |  |  |  |  |  |  |  |  |  |  |  |  |         |      |         |      |        |      |    |    |    |    |    |    |
|------------------------------|---------------------------|-------|---------|--|--|--|--|--|--|--|--|--|--|--|--|--|--|--|---------|------|---------|------|--------|------|----|----|----|----|----|----|
| KING CITY CA                 | GHCND:<br>USC<br>00044555 | 36.22 | -121.12 |  |  |  |  |  |  |  |  |  |  |  |  |  |  |  | 274.39  | 0.45 | 250.77  | 0.45 | 2.04   | 2.33 | 0  | 0  | 0  | 0  | 0  | 0  |
| LIVERMORE CA                 | GHCND:<br>USC<br>00044997 | 37.68 | -121.77 |  |  |  |  |  |  |  |  |  |  |  |  |  |  |  | 356.53  | 0.36 | 319.05  | 0.38 | 4.43   | 1.43 | 0  | 0  | 0  | 0  | 0  | 0  |
| MORRO BAY FIRE<br>DEPARTMENT | GHCND:<br>USC<br>00045866 | 35.37 | -120.85 |  |  |  |  |  |  |  |  |  |  |  |  |  |  |  | 405.23  | 0.49 | 367.94  | 0.50 | 4.83   | 1.89 | v2 | 0  | v2 | 0  | v2 | ^1 |
| ORLEANS CA US                | GHCND:<br>USC<br>00046508 | 41.30 | -123.53 |  |  |  |  |  |  |  |  |  |  |  |  |  |  |  | 1313.95 | 0.28 | 1112.50 | 0.32 | 31.39  | 0.87 | 0  | v2 | 0  | v2 | 0  | 0  |
| ROSEBURG KQEN<br>OR          | GHCND:<br>USC<br>00357331 | 43.20 | -123.35 |  |  |  |  |  |  |  |  |  |  |  |  |  |  |  | 820.23  | 0.25 | 647.48  | 0.29 | 42.89  | 0.63 | 0  | 0  | 0  | 0  | v2 | 0  |
| SALINAS DAM<br>CA            | GHCND:<br>USC<br>00047672 | 35.33 | -120.50 |  |  |  |  |  |  |  |  |  |  |  |  |  |  |  | 530.14  | 0.48 | 489.90  | 0.49 | 2.89   | 2.13 | 0  | 0  | 0  | 0  | 0  | 0  |
| SALINAS<br>NUMBER 2 CA       | GHCND:<br>USC<br>00047668 | 36.67 | -121.62 |  |  |  |  |  |  |  |  |  |  |  |  |  |  |  | 338.58  | 0.42 | 306.79  | 0.44 | 4.13   | 1.31 | 0  | v1 | 0  | v1 | 0  | v1 |
| SEASIDE OR                   | GHCND:<br>USC<br>00357641 | 45.92 | -123.82 |  |  |  |  |  |  |  |  |  |  |  |  |  |  |  | 1842.69 | 0.20 | 1393.71 | 0.23 | 130.34 | 0.44 | 0  | 0  | 0  | 0  | v1 | 0  |

**Table S4.** Site name, code number, location, and period of record (between 1975 and 2015); average annual precipitation and CV, percentage of precipitation during the wet half of the year (fall-winter-spring: FWS) and CV, percentage of precipitation in summer and CV; and trends in annual precipitation, FWS precipitation, and summer precipitation, and associated variability (var'y) for sites in South Africa. (First site from NOAA Climate Data Online; all others from GHCN)

| South Africa         |                    |        |       | Period of Record between 1975 and 2015 |       |       |       |       |       |       |       | Annual Precip |       | % In FWS |       | % In Summer |      | Annual, Trends |                | FWS Trends   |                | Summer Trends |                |
|----------------------|--------------------|--------|-------|----------------------------------------|-------|-------|-------|-------|-------|-------|-------|---------------|-------|----------|-------|-------------|------|----------------|----------------|--------------|----------------|---------------|----------------|
|                      | NOAA Site Number   | LAT    | LONG  | 75–79                                  | 80–84 | 85–89 | 90–94 | 95–99 | 00–04 | 05–09 | 10–15 | Mean          | CV    | Mean     | CV    | Mean        | CV   | ppt<br>^ / v   | var'y<br>^ / v | ppt<br>^ / v | var'y<br>^ / v | ppt<br>^ / v  | var'y<br>^ / v |
| Port Elizabeth INTL  | 688420             | -33.99 | 25.62 |                                        |       |       |       |       |       |       |       | 615.43        | 0.26  | 930.35   | 0.22  | 112.76      | 0.53 | 0              | 0              | 0            | 0              | 0             | 0              |
| Worcester            | GHCND: SF000227590 | -33.62 | 19.47 |                                        |       |       |       |       |       |       |       | 258.46        | 0.34  | 450.51   | 0.28  | 24.66       | 1.10 | v1             | 0              | v1           | 0              | 0             | 0              |
| Malmesbury           | GHCND: SF000414170 | -33.47 | 18.72 |                                        |       |       |       |       |       |       |       | 419.40        | 0.35  | 753.93   | 0.31  | 31.37       | 0.83 | v1             | 0              | v1           | ^1             | v2            | 0              |
| Langebaan            | GHCND: SF000400350 | -33.08 | 18.02 |                                        |       |       |       |       |       |       |       | 254.49        | 0.32  | 464.37   | 0.27  | 15.23       | 1.23 | ^2             | 0              | ^2           | 0              | 0             | 0              |
| Cape Town Intl       | GHCND: SFM00068816 | -33.97 | 18.60 |                                        |       |       |       |       |       |       |       | 477.86        | 0.28  | 835.59   | 0.22  | 41.07       | 0.63 | v1             | 0              | v1           | 0              | v1            | 0              |
| Cape Agulhas         | GHCND: SF000068920 | -34.83 | 20.02 |                                        |       |       |       |       |       |       |       | 463.76        | 0.23  | 780.20   | 0.17  | 65.96       | 0.62 | 0              | 0              | ^2           | 0              | 0             | v2             |
| ALBERTINIA POL SF    | GHCND: SF000111320 | -34.20 | 21.60 |                                        |       |       |       |       |       |       |       | 476.86        | 0.289 | 266.7    | 0.374 | 83.759      | 0.55 | ^1             | v2             | 0            | 0              | 0             | 0              |
| BOONTJIESKRAAL SF    | GHCND: SF000066120 | -34.22 | 19.35 |                                        |       |       |       |       |       |       |       | 399.53        | 0.222 | 283.75   | 0.197 | 46.078      | 0.75 | ^2             | 0              | 0            | 0              | ^1            | 0              |
| BUFFELSKLIP SF       | GHCND: SF000296920 | -33.53 | 22.90 |                                        |       |       |       |       |       |       |       | 248.33        | 0.407 | 124.29   | 0.439 | 58.737      | 0.8  | 0              | 0              | 0            | 0              | 0             | 0              |
| DE RUST POL SF       | GHCND: SF000490600 | -33.48 | 22.53 |                                        |       |       |       |       |       |       |       | 317.97        | 0.319 | 166.48   | 0.337 | 63.833      | 0.56 | 0              | 0              | 0            | 0              | 0             | v1             |
| HANKEY POL SF        | GHCND: SF000336800 | -33.83 | 24.88 |                                        |       |       |       |       |       |       |       | 424.97        | 0.379 | 186.53   | 0.485 | 90.185      | 0.6  | 0              | 0              | 0            | 0              | 0             | 0              |
| HEROLD POL SF        | GHCND: SF000287710 | -33.85 | 22.45 |                                        |       |       |       |       |       |       |       | 475.14        | 0.418 | 270.14   | 0.492 | 69          | 0.53 | 0              | 0              | v2           | 0              | 0             | 0              |
| KWEPERTUIN SF        | GHCND: SF000281500 | -34.00 | 22.07 |                                        |       |       |       |       |       |       |       | 554.83        | 0.291 | 240.82   | 0.331 | 138.38      | 0.45 | ^1             | 0              | 0            | v2             | 0             | 0              |
| MATJIESRIVIER SKL SF | GHCND: SF000480830 | -33.40 | 22.07 |                                        |       |       |       |       |       |       |       | 434.65        | 0.386 | 637.7    | 0.312 | 89.915      | 0.49 | ^1             | 0              | ^1           | 0              | 0             | v1             |

|                      |                       |        |       |  |  |  |  |  |  |  |  |  |  |  |  |  |        |       |        |       |        |      |   |   |    |    |    |   |    |
|----------------------|-----------------------|--------|-------|--|--|--|--|--|--|--|--|--|--|--|--|--|--------|-------|--------|-------|--------|------|---|---|----|----|----|---|----|
| ROOIRIVIER<br>BOS SF | GHCND:<br>SF000295420 | -33.53 | 22.82 |  |  |  |  |  |  |  |  |  |  |  |  |  | 284.38 | 0.328 | 431.09 | 0.225 | 63.03  | 0.69 | 0 | 0 | 0  | 0  | 0  | 0 | v1 |
| SANDHOOGTE<br>PUR SF | GHCND:<br>SF000123030 | -34.07 | 22.18 |  |  |  |  |  |  |  |  |  |  |  |  |  | 517.67 | 0.288 | 752.29 | 0.227 | 128.97 | 0.47 | 0 | 0 | v1 | 0  | v2 | 0 |    |
| STILBAAI BOS<br>SF   | GHCND:<br>SF000107420 | -34.37 | 21.42 |  |  |  |  |  |  |  |  |  |  |  |  |  | 445.51 | 0.219 | 690.76 | 0.142 | 82.893 | 0.48 | 0 | 0 | 0  |    | 0  | 0 |    |
| UITENHAGE SF         | GHCND:<br>SF000347620 | -33.70 | 25.43 |  |  |  |  |  |  |  |  |  |  |  |  |  | 503.98 | 0.394 | 695.71 | 0.304 | 133.76 | 0.58 | 0 | 0 | v1 | 0  | 0  | 0 |    |
| ZUUR ANYS SF         | GHCND:<br>SF000325030 | -33.90 | 24.28 |  |  |  |  |  |  |  |  |  |  |  |  |  | 533    | 0.386 | 797.31 | 0.243 | 113.64 | 0.59 | 0 | 0 | 0  | ^1 | 0  | 0 |    |

**Table S5.** Site name, code number, location, and period of record (between 1975 and 2015); average annual precipitation and CV, percentage of precipitation during the wet half of the year (fall-winter-spring: FWS) and CV, percentage of precipitation in summer and CV; and trends in annual precipitation, FWS precipitation, and summer precipitation, and associated variability (var'y) for sites in South America. (CDO indicates data from NOAA Climate Data Online; all others from Direccion Meteorologica de Chile).

| South America              |                  |        |        | Period of Record between 1975 and 2015 |       |       |       |       |         |       |       | Annual Precip |      | % In FWS |      | % In Summer |      | Annual, Trends |       | FWS Trends |       | Summer Trends |       |
|----------------------------|------------------|--------|--------|----------------------------------------|-------|-------|-------|-------|---------|-------|-------|---------------|------|----------|------|-------------|------|----------------|-------|------------|-------|---------------|-------|
|                            | NOAA Site Number | LAT    | LONG   | 75–79                                  | 80–84 | 85–89 | 90–94 | 95–99 | 2000–04 | 05–09 | 10–15 | Mean          | CV   | Mean     | CV   | Mean        | CV   | ppt            | var'y | ppt        | var'y | ppt           | var'y |
|                            |                  |        |        |                                        |       |       |       |       |         |       |       |               |      |          |      |             |      | ^ / v          | ^ / v | ^ / v      | ^ / v | ^ / v         | ^ / v |
| ARTURO MERINO BENITEZ INTL | CDO 855740       | -33.39 | -70.79 |                                        |       |       |       |       |         |       |       | 260.25        | 0.55 | 203.60   | 0.63 | 24.95       | 2.40 | v1             | 0     | v2         | 0     | v1            | 0     |
| CARRIEL SUR INTL           | CDO 856820       | -36.77 | -73.06 |                                        |       |       |       |       |         |       |       | 952.58        | 0.29 | 775.06   | 0.33 | 50.79       | 0.98 | v1             | 0     | 0          | 0     | 0             | v2    |
| JUAN FERNANDEZ             | CDO 855850       | -33.63 | -78.83 |                                        |       |       |       |       |         |       |       | 938.33        | 0.35 | 718.53   | 0.42 | 73.93       | 0.69 | 0              | 0     | 0          | 0     | 0             | 0     |
| MAQUEHUE                   | CDO 857430       | -38.77 | -72.64 |                                        |       |       |       |       |         |       |       | 1017.15       | 0.27 | 721.07   | 0.33 | 102.91      | 0.47 | 0              | 0     | 0          | v2    | 0             | v1    |
| BALMACEDA                  | CDO 858740       | -45.92 | -71.69 |                                        |       |       |       |       |         |       |       | 476.04        | 0.33 | 328.33   | 0.41 | 60.85       | 0.57 | 0              | 0     | 0          | 0     | 0             | 0     |
| Puerto Aysen               | 450001           | -43.40 | -72.66 |                                        |       |       |       |       |         |       |       | 1986.29       | 0.35 | 1145.52  | 0.44 | 362.67      | 0.48 | v1             | v1    | v1         | v2    | v1            | 0     |
| Canal Bajo Osbourne        | 400009           | -40.61 | -73.06 |                                        |       |       |       |       |         |       |       | 1217.11       | 0.16 | 875.01   | 0.19 | 138.75      | 0.48 | 0              | v1    | 0          | 0     | 0             | 0     |
| El Tepual Puerto Montt     | 410005           | -41.44 | -73.10 |                                        |       |       |       |       |         |       |       | 1575.78       | 0.16 | 1016.95  | 0.19 | 236.18      | 0.39 | v2             | 0     | 0          | 0     | v1            | 0     |
| ESQUEL                     | 878030           | -42.91 | -71.14 |                                        |       |       |       |       |         |       |       | 499.27        | 0.33 | 327.92   | 0.34 | 78.84       | 1.00 | ^2             | 0     | ^2         | 0     | 0             | 0     |
| SAN CARLOS DE BARILOCHE    | 877650           | -41.15 | -71.16 |                                        |       |       |       |       |         |       |       | 687.54        | 0.45 | 508.70   | 0.49 | 68.91       | 0.80 | ^1             | 0     | ^1         | 0     | 0             | 0     |

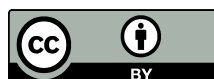

Supplement: s1 [file s1]
